# Supplementary material for: Efficient genome editing in plants using a CRISPR/Cas system
Source: PubMed Central journal article supplement — Cell Res. 2013 Aug 20;23(10):1229–32. doi: 10.1038/cr.2013.114 (PMC3790235; doi:10.1038/cr.2013.114), 2013-08-20
Supplement: cr2013114x2.pdf [file cr2013114x2.pdf]

*BR11* sgRNA1(EcoRV) 5' -TTTATTCTCAATTTGGGTCATAACGATATCTCTGGTT  
 |||  
 3' -AAATAAGAGTTAAACCCAGTATTGCTATAGAGACCAA

*BR11* sgRNA2 (Bsu36I) 5' -ATCCCTCAGGAGCTCATGTATGTCAAGACCTTAGAGA  
 |||  
 3' -TAGGGAGTCCFCGAGTACATACAGTCTTGGAAATCTCT

*BR11* sgRNA3 (Bsu36I) 5' -TTCCTCAGGCTATGTCAGCTCTTACTATGCTTACGGA  
 |||  
 3' -AAGGAGTCCGATACAGTCGAGAATGATACGAATGCCT

*GAI* sgRNA1 5' -GGTAACGGCATGGATGAGCTTCTAGCTGTCTTGGTT  
 |||  
 3' -CCATTGCCGTACCTACTCGAAGATCGACAAGAACCAA

*JAZ1* sgRNA1 5' -CACCATTGACAGAACTTCCTATTGCTAGAGAGCTTC  
 |||  
 3' -GTGGTAACTGTCTTGAAGGATAACGATCTTCTCGAAG

*ROC5* sgRNA1 (AhdI) 5' -AGGGACACTGAGCGGAGAACGACAGCCGGTCGGAA  
 |||  
 3' -TCCCTGTGACTCCGCCCTCTGCTGTCGGCCAGCCCTT

*SPP* sgRNA1 (EcoNI) 5' -CGCGGCCTCGGCGGCGATTGGGACCTTCGGCGAGGAG  
 |||  
 3' -GCGCCGAGCCGCCCTAACCTCGGAGCCGCTCCTC

*YSA* sgRNA1 (SfiI) 5' -GGCCGCTTCGGCCGAGGTGGCGGCCTCCCGGCACGG  
 |||  
 3' -CCGGCGAAGCCGCTCCACCGCGCGGAGGGCCGTGCC

*YSA* sgRNA2 (EcoNI) 5' -GACCTCATGAAGGTGCTCGTCGCGGAGATGCGGCGGG  
 |||  
 3' -CTGGAGTACTTCCACGAGCAGCGCCTCTACGCCGCC

**Supplementary information, Figure S2** The target sites designed for generation of stable transgenic plants in *Arabidopsis* and rice.

The restriction sites for RFLP analysis of transgenic plants are in boxes. The PAM sequences are highlighted in magenta and the target sequences in cyan.
