# Supplementary material for: Efficient genome editing in plants using a CRISPR/Cas system
Source: PubMed Central journal article supplement — Cell Res. 2013 Aug 20;23(10):1229–32. doi: 10.1038/cr.2013.114 (PMC3790235; doi:10.1038/cr.2013.114), 2013-08-20
Supplement: cr2013114x11.pdf [file cr2013114x11.pdf]

## YSA sgRNA2 site

Mutation detected from 44 out of 59 sequenced clones

|   |                                            |                                           |
|---|--------------------------------------------|-------------------------------------------|
|   | CCGCCGCATCTCCGCGACGAGCACCTT-CATGAGGTCGAGG  | WT                                        |
| 1 | CCGCCGCATCTCCGCGACGAGCACAT-----GAGGTCGAGG  | D4                                        |
|   | CCGCCGCATCTCCGCGACGAG-----ATGAGGTCGAGG     | D7                                        |
|   | CCGCCGCATCTCCGCGACGAGCA-----ATGAGGTCGAGG   | D5                                        |
|   | CCGCCGCATCTCCGCGACGAGCA-----TATGAGGTCGAGG  | D4                                        |
|   | CCGCCGCATCTCCGCGACGAGCAC---CATGAGGTCGAGG   | D2                                        |
|   | CCGCCGCATCTCCGCGACGAGCA-----GAGGTCGAGG     | D7                                        |
|   | CCGCCGCATCTCCGCGACGAGCAC-----GAGGTCGAGG    | D6                                        |
|   | CCGCCGCATCTCCGCGACGA-----TGAGGTCGAGG       | D9                                        |
|   |                                            | CCGCCGCATCTCCGCGACGAG-----CATGAGGTCGAGG   |
| 2 | CCGCCGCATCTCCGCGACGAGCA-----CATGAGGTCGAGG  | D4 (×4)                                   |
|   | CCGCCGCATCTCCGCGACGAGCA-----ATGAGGTCGAGG   | D5                                        |
|   | CCGCCGCATCTCCGCGACGAGC-----AATGAGGTCGAGG   | D5+1                                      |
|   | CCGCCGCATCTCCGCGACGAG-----CATGAGGTCGAGG    | D6 (×3)                                   |
|   | CCGCCGCATCTCCGCGACGAGCA-----CATGAGGTCGAGG  | D4 (×2)                                   |
| 3 | CCGCCGCATCTCCGCGACGAG-----CATGAGGTCGAGG    | D6                                        |
|   | CCGCCGCATCTCCGCGACGAGCACCTTCCATGAGGTCGAGG  | +1                                        |
|   | CCGCCGCATCTCCGCGACGAGCG-----GTGAGGTCGAGG   | D5                                        |
|   | CCGCCGCATCTCCGCGACGAGCAC-----CATGAGGTCGAGG | D3                                        |
| 4 | CCGCCGCATCTCCGCGACGAACACCTT-C--GAGGTCGAGG  | D2                                        |
|   | CCGCCGCATCTCCGCGACGA-----CATGAGGTCGAGG     | D7                                        |
|   |                                            | CCGCCGCATCTCCGCGACGAGCACCTTCAATGAGGTCGAGG |
| 5 | CCGCCGCATCTCCGCGACGAGCACCTTCTATGAGGTCGAGG  | +1                                        |
|   | CCGCCGCATCTCCGCGACGAGCA-----               | D20                                       |
|   |                                            | CCGCCGCATCTCCGCGACGAGCA-----TGAGGTCGAGG   |
| 6 | CCGCCGCATCTCCGCGACGAGCAC-----ATGAGGTCGAGG  | D4 (×2)                                   |
|   | CCGCCGCATCTCCGCGACGAGCACCTT--ATGAGGTCGAGG  | D1                                        |
|   | CCGCCGCATCTCCGCGACGAGCACCT--ATGAGGTCGAGG   | D2                                        |
|   | CCGCCGCATCTCCGCGACGAG-----ATGAGGTCGAGG     | D7                                        |
|   | CCGCCGCATCTCCGCGACGAGCACC-----ATGAGGTCGAGG | D3                                        |
|   | CCGCCGCATCTCCGCGACGAG-----AGG              | D16                                       |
|   |                                            | CCGCCGCATCTCCGCGACGAG-----AGG             |

**Supplementary information, Figure S11** Targeted indel mutations induced by engineered sgRNA:Cas9 at the *YSA* gene sgRNA2 site in rice.

Alleles shown were amplified from genomic DNA isolated from 6 independent T0 transgenic plants separately and sequenced after cloned into vectors. The wild type sequence is shown at the top with the PAM sequence highlighted in magenta and the target sequence in cyan. Red dashes, deleted bases; red bases, insertions or mutations. The net change in length is to the right of each sequence (+, insertion; D, deletion). The number of clones representing each mutant allele is shown in brackets. The plants #5 and #6 correspond to the two plants showing albino leaf phenotype.
