# Supplementary material for: Efficient genome editing in plants using a CRISPR/Cas system
Source: PubMed Central journal article supplement — Cell Res. 2013 Aug 20;23(10):1229–32. doi: 10.1038/cr.2013.114 (PMC3790235; doi:10.1038/cr.2013.114), 2013-08-20
Supplement: cr2013114x12.pdf [file cr2013114x12.pdf]

**Supplementary information, Table S1 Mutation detected in the T1 transgenic plants of *Arabidopsis***

|                    | Plant ID | No. of clones sequenced | No. of clones with mutant alleles detected | No. of different mutant alleles detected |
|--------------------|----------|-------------------------|--------------------------------------------|------------------------------------------|
| <i>BRI1</i> sgRNA1 | 1        | 9                       | 7                                          | 4                                        |
|                    | 2        | 8                       | 8                                          | 8                                        |
|                    | 3        | 8                       | 3                                          | 3                                        |
|                    | 4        | 10                      | 8                                          | 7                                        |
|                    | 5        | 7                       | 7                                          | 4                                        |
|                    | 6        | 8                       | 5                                          | 4                                        |
|                    | 7        | 7                       | 6                                          | 5                                        |
|                    | 8        | 7                       | 4                                          | 4                                        |
|                    | 9        | 10                      | 8                                          | 5                                        |
|                    | 10       | 10                      | 9                                          | 6                                        |
|                    | 11       | 6                       | 4                                          | 4                                        |
|                    | 12       | 8                       | 6                                          | 6                                        |
|                    | Total    | <b>98</b>               | <b>75</b>                                  | <b>60</b>                                |
| <i>BRI1</i> sgRNA2 | 1        | 23                      | 13                                         | 3                                        |
|                    | 2        | 24                      | 11                                         | 4                                        |
|                    | 3        | 24                      | 4                                          | 2                                        |
|                    | Total    | <b>71</b>               | <b>28</b>                                  | <b>9</b>                                 |
| <i>BRI1</i> sgRNA3 | 1        | 10                      | 6                                          | 4                                        |
|                    | 2        | 9                       | 7                                          | 2                                        |
|                    | 3        | 6                       | 4                                          | 3                                        |
|                    | 4        | 9                       | 5                                          | 2                                        |
|                    | Total    | <b>34</b>               | <b>22</b>                                  | <b>11</b>                                |
| <i>GAI</i> sgRNA1  | 1        | 15                      | 8                                          | 1                                        |
|                    | 2        | 19                      | 4                                          | 2                                        |
|                    | 3        | 19                      | 5                                          | 1                                        |
|                    | Total    | <b>53</b>               | <b>17</b>                                  | <b>4</b>                                 |
| <i>JAZ1</i> sgRNA1 | 1        | 16                      | 1                                          | 1                                        |
|                    | 2        | 18                      | 5                                          | 3                                        |
|                    | 3        | 22                      | 4                                          | 2                                        |
|                    | 4        | 17                      | 12                                         | 11                                       |
|                    | 5        | 16                      | 11                                         | 8                                        |
|                    | Total    | <b>89</b>               | <b>33</b>                                  | <b>25</b>                                |
