# Supplementary material for: Efficient genome editing in plants using a CRISPR/Cas system
Source: PubMed Central journal article supplement — Cell Res. 2013 Aug 20;23(10):1229–32. doi: 10.1038/cr.2013.114 (PMC3790235; doi:10.1038/cr.2013.114), 2013-08-20
Supplement: cr2013114x13.pdf [file cr2013114x13.pdf]

**Supplementary information, Table S2 Mutation detected in the T0 transgenic plants of rice**

|                    | Plant ID   | No. of clones sequenced | No. of clones with mutant alleles detected | No. of different mutant alleles detected |
|--------------------|------------|-------------------------|--------------------------------------------|------------------------------------------|
| <i>ROC5</i> sgRNA1 | 1          | 33                      | 27                                         | 1                                        |
|                    | 2          | 27                      | 19                                         | 5                                        |
|                    | 3          | 31                      | 29                                         | 1                                        |
|                    | 4          | 41                      | 28                                         | 2                                        |
|                    | 5          | 33                      | 33                                         | 2                                        |
|                    | Total      | <b>165</b>              | <b>136</b>                                 | <b>11</b>                                |
| <i>SPP</i> sgRNA1  | 1          | 36                      | 31                                         | 1                                        |
|                    | Total      | <b>36</b>               | <b>31</b>                                  | <b>1</b>                                 |
| <i>YSA</i> sgRNA1  | 1          | 17                      | 10                                         | 2                                        |
|                    | 2          | 10                      | 5                                          | 1                                        |
|                    | 3          | 13                      | 8                                          | 1                                        |
|                    | 4          | 8                       | 5                                          | 3                                        |
|                    | 5          | 15                      | 15                                         | 2                                        |
|                    | 6          | 8                       | 3                                          | 1                                        |
|                    | 7          | 20                      | 20                                         | 1                                        |
|                    | 8          | 10                      | 5                                          | 1                                        |
|                    | 9          | 14                      | 10                                         | 2                                        |
|                    | 10         | 8                       | 3                                          | 1                                        |
|                    | 11         | 17                      | 12                                         | 1                                        |
|                    | 12         | 17                      | 14                                         | 2                                        |
| Total              | <b>157</b> | <b>110</b>              | <b>18</b>                                  |                                          |
| <i>YSA</i> sgRNA2  | 1          | 11                      | 8                                          | 8                                        |
|                    | 2          | 11                      | 11                                         | 5                                        |
|                    | 3          | 10                      | 5                                          | 4                                        |
|                    | 4          | 9                       | 3                                          | 3                                        |
|                    | 5          | 6                       | 6                                          | 3                                        |
|                    | 6          | 12                      | 11                                         | 7                                        |
| Total              | <b>59</b>  | <b>44</b>               | <b>30</b>                                  |                                          |
