# Supplementary material for: Efficient genome editing in plants using a CRISPR/Cas system
Source: PubMed Central journal article supplement — Cell Res. 2013 Aug 20;23(10):1229–32. doi: 10.1038/cr.2013.114 (PMC3790235; doi:10.1038/cr.2013.114), 2013-08-20
Supplement: cr2013114x14.pdf [file cr2013114x14.pdf]

**Supplementary information, Table S3** List of primers used in this study.

| Usage        | Primer name    | Sequence ( 5'-->3' )                                                                 |
|--------------|----------------|--------------------------------------------------------------------------------------|
| Cloning      | YF-FP 1F       | ACACGCTCGAGATGGTGAGCAAGGGCGAGG                                                       |
|              | YF-FP 1R       | ACACGGTTCGACACTAGTGGATCCGTGGCGGATCTTGAAGTTCAC                                        |
|              | YF-FP 2F       | ACACGGGATCCACTAGTGTGACGACCACATGAAGCAGCACGAC                                          |
|              | YF-FP 2R       | ACACGGAGCTCTTACTTGTACAGCTCGTC                                                        |
|              | AtU6-26F       | AAGCTTCGTTGAACAACGGA                                                                 |
|              | AtU6-26R       | CGAAGGGACAATCACTACTTCCG                                                              |
|              | OsU6-F         | GGATCATGAACCAACGGCCT                                                                 |
|              | OsU6-R         | AACACAAGCGACAGCGCG                                                                   |
|              | Cas9-F         | TTACTCGAGATGGACTATAAGGACCACGACG                                                      |
|              | Cas9-R         | ATTGGATCCTTACTTTTTCTTTTTTGCCTGGC                                                     |
| sgRNA fusion | AtU6-26-85F    | TTATTTTAACTTGCTATTTCTAGCTCTAAAACAGGTCTTCTC<br>GAAGACCCAATCACTACTTCGACTCTAGCTGTA      |
|              | AtU6-26-85R    | GTTAAAATAAGGCTAGTCCGTTATCAACTTGAAAAAGTGGC<br>ACCGAGTCGGTGCTTTTTTTGTCCCTTCGAAGGGCCTTT |
|              | TPCR-OsU6F     | GCCAGTGTGCTGGAATTGCCCTTGATCATGAACCAACGGCC                                            |
|              | TPCR-OsU6R     | GCTCTAAAACAGGTCTTCTCGAAGACCCACACAAGCGACAGCGCC                                        |
| Target oligo | YF-FP sgRNA1 F | GATTGTGAACTTCAAGATCCGCCA                                                             |
|              | YF-FP sgRNA1 R | AAACTGGCGGATCTTGAAGTTCAC                                                             |
|              | BRI1 sgRNA1 F  | GATTGTGGGTCATAACGATATCTC                                                             |
|              | BRI1 sgRNA1 R  | AAACGAGATATCGTTATGACCCAC                                                             |
|              | BRI1 sgRNA2 F  | GATTGGACATACATGAGCTCCTGA                                                             |
|              | BRI1 sgRNA2 R  | AAACTCAGGAGCTCATGTATGTCC                                                             |
|              | BRI1 sgRNA3 F  | GATTGTAAGAGCTGACATAGCCTG                                                             |
|              | BRI1 sgRNA3 R  | AAACCAGGCTATGTCAGCTCTTAC                                                             |
|              | GAI sgRNA1 F   | GATTGATGAGCTTCTAGCTGTTCT                                                             |
|              | GAI sgRNA1 R   | AAACAGAACAGCTAGAAGCTCATC                                                             |
|              | JAZ1 sgRNA1 F  | GATTGGCAATAGGAAGTTCTGTCAA                                                            |
|              | JAZ1 sgRNA1 R  | AAACTTGACAGAACTTCCTATTGCC                                                            |
|              | ROC5 sgRNA1 F  | GTGTGCGGAGAACGACAGCCGGTC                                                             |
|              | ROC5 sgRNA1 R  | AAACGACCGGCTGTCGTTCTCCGC                                                             |
|              | SPP sgRNA1 F   | GTGTG GCGATTGGGAGCCTCGGCG                                                            |
|              | SPP sgRNA1 R   | AAACCGCCGAGGCTCCCAATCGCC                                                             |
|              | YSA sgRNA1 F   | GTGTGCGCGCCACCTCGGCCGAAG                                                             |
|              | YSA sgRNA1 R   | AAACCTTCGGCCGAGGTGGCGCGC                                                             |
|              | YSA sgRNA2 F   | GTGTGCGCGACGAGCACCTTCATG                                                             |
|              | YSA sgRNA2 R   | AAACCATGAAGGTGCTCGTCGCGC                                                             |
| RFLP PCR     | BRI1 1F        | GAATCTCTGACGAATCTATCC                                                                |
|              | BRI1 1R        | CACTCTTTCTTCATCCCATC                                                                 |
|              | BRI1 2F        | GATGGGATGAAGAAAGAGTG                                                                 |
|              | BRI1 2R        | CTCATCTCTTACCAACAAG                                                                  |
|              | GAI F          | TGTTATTAGAAGTGGTAGTGGAGTG                                                            |
|              | GAI R          | AGCCGTCGCTGTAGTGGTT                                                                  |
|              | JAZ1 F         | CAACCATGAGTTTATTCCCTTGT                                                              |
|              | JAZ1 R         | GGATTTAGACAGGCGACAATAAC                                                              |
|              | ROC5 F         | CTTTGGGGCCCTCTTTGAC                                                                  |
|              | ROC5 R         | ATCTGCGTGCGGCGATTC                                                                   |
|              | SPP F          | GTGAGCCCGAAGAGGAGT                                                                   |
|              | SPP R          | TCCCAATAAACACACGCAC                                                                  |
|              | YSA F          | ACTTCCTCCCTCTCCCTGT                                                                  |
|              | YSA R          | CGCCTTCATCAGTGTGTTG                                                                  |
