# Supplementary material for: Efficient genome editing in plants using a CRISPR/Cas system
Source: PubMed Central journal article supplement — Cell Res. 2013 Aug 20;23(10):1229–32. doi: 10.1038/cr.2013.114 (PMC3790235; doi:10.1038/cr.2013.114), 2013-08-20
Supplement: cr2013114x15.pdf [file cr2013114x15.pdf]

## **Supplementary information, Data S1 MATERIALS AND METHODS**

### **Growth of *Arabidopsis* and rice plants**

*Arabidopsis thaliana* ecotype Columbia (Col-0) was used in all experiments. Seeds were sown on MS plates and stratified for 3 days at 4 °C, then grown under long-day conditions (16 h light/8 h dark) at 22 °C for 5 days before being transplanted in soil. Rice plants were grown under standard greenhouse condition (16h light at 30 °C /8h night at 22 °C).

### **Vector construction**

The coding sequence of hSpCas9 was cloned from vector pX260<sup>1</sup> using primers Cas9-F and Cas9-R (Table S2) and subcloned into pA7-GFP with XhoI and BamHI to replace the GFP gene, which provided a 2x 35S promoter and a Nos terminator. Then the Cas9 expression cassette was subcloned into the pBluescript SK+ vector (Stratagene Inc., San Diego, CA) and designated 35S-Cas9-SK.

The AtU6-26 promoter was cloned from *Arabidopsis* wild type Col-0 genomic DNA by PCR with primers AtU6-26F and AtU6-26R (Table S2) adding KpnI and XhoI on the two ends, respectively, and put into the pEasy Blunt vector (Transgen Biotech, China). They were then subcloned into the pBluescript SK+ vector (Stratagene Inc., San Diego, CA) using KpnI and XhoI sites. The 85bp chimeric guide RNA region containing two BbsI digest sites was amplified from the vector pX330<sup>1</sup> by PCR using AtU6-26-85F and AtU6-26-85R (Table S2) and fused to the AtU6-26 promoter, which resulted in AtU6-26SK. After the designed oligos (20bp targeting sequences) were cloned into the BbsI sites, these chimeric RNA expression cassettes between KpnI and SalI were either cloned into the 35S-Cas9-SK for transient assay, or into the KpnI and EcoRI region of pCambia1300 vector (Cambia, Canberra, Australia) together with the SalI and EcoRI fragment of the Cas9 expression cassette for stable transformation of *Arabidopsis*.

The OsU6-2 promoter was cloned from rice wild type Nipponbare genomic DNA by PCR using OsU6-F and OsU6-R (Table S2) and put into the pEasy Blunt vector (Transgen Biotech, China). Then transfer PCR was conducted using TPCR-OsU6F and TPCR-OsU6R (Table S2) to replace the AtU6-26 promoter in the AtU6-26SK vector, which produced the OsU6SK vector with the 85nt guide RNA region. After target oligos were successfully inserted into the BbsI sites of the OsU6SK vector, the chimeric RNA expression cassettes between KpnI and HindIII were similarly cloned into the pCambia1300 vector (Cambia, Canberra, Australia) between the KpnI and EcoRI sites together with the HindIII and EcoRI Cas9 expression cassette for stable transformation of rice.

### **Transient YFP-HR reporter assay**

A HR-based transient YFP reporter was constructed based on the pA7-YFP vector. The 1-510 bp and 229-720 bp coding sequences of YFP were cloned by PCR and fused together with an

18 bp linker (GGATCC ACTAGT GTCGAC), creating a split YFP with 282 bp overlapping. The isolation and PEG transformation of *Arabidopsis* mesophyll protoplasts were as described<sup>2</sup>. The transformed protoplasts were examined using a flow cytometer (BECKMAN COULTER MoFlo™ XDP, USA) after 16-24 hours of incubation in the dark according to the manufacturer's instructions.

### **Generation of *Arabidopsis* and rice stable transgenic plants**

The pCambia1300 vectors containing the hSpCas9 expression cassette and the guide RNA expression cassettes were transformed into *Agrobacterium* strain GV3101 and EHA105 by the freeze-thaw method for transformation of *Arabidopsis* and rice, respectively. Healthy *Arabidopsis* Col-0 wild type plants at the flowering stage were used for transformation by the floral dipping method<sup>3</sup>. The collected seeds were screened on MS plates with 20 µg/L hygromycin. *Agrobacterium*-mediated transformation of the callus of rice cultivar Kasalath was conducted as described<sup>4</sup>.

### **RFLP analysis of genome modification**

Genomic DNA was extracted from stable transgenic plants from hygromycin selection and wild type control plants. PCR was performed using specific primers for each target (Table S2). After purification, about 400 nanograms of PCR product was digested overnight with the corresponding restriction enzymes designed for each target site. Digested DNA was separated on an ethidium bromide-stained agarose gel (1.5%). The digest-resistant bands were recovered and cloned into the pZeroBack Blunt vector (Tiangen Biotech, China), and mutations were identified by Sanger sequencing of individual clones.

## SUPPLEMENTARY NOTE

### Sequence of the sgRNA and Cas9 expression cassettes

#### >AtU6-26 sgRNA

GGTACCGAGCTCGGATCCACTAGTAACGGCCGCCAGTGTGCTGGAATTGCCCTTAA  
GCTTCGTTGAACAACGGAACTCGACTTGCCTTCCGCACAATACATCATTCTTCTT  
AGCTTTTTTTCTTCTTCTTCGTTTCATACAGTTTTTTTTTTGTTTATCAGCTTACATTTT  
TTGAACCGTAGCTTTCGTTTTCTTCTTTTTAACTTTCCATTCGGAGTTTTTGTATCTT  
GTTTCATAGTTTGTCCCAGGATTAGAATGATTAGGCATCGAACCTTCAAGAATTTGA  
TTGAATAAAACATCTTCATTCTTAAGATATGAAGATAATCTTCAAAGGCCCTGGG  
AATCTGAAAGAAGAGAAGCAGGCCATTTATATGGGAAAGAACAATAGTATTTCTT  
ATATAGGCCCATTTAAGTTGAAAACAATCTTCAAAGTCCACATCGCTTAGATAA  
GAAAACGAAGCTGAGTTTATATACAGCTAGAGTCGAAGTAGTGATTGGGTCTTCGA  
GAAGACCTGTTTTAGAGCTAGAAATAGCAAGTTAAAATAAGGCTAGTCCGTTATCA  
ACTTGAAAAAGTGGCACCAGTTCGGTGCTTTTTTTGTCCCTTCGAAGGGCCTTCT  
CAGATATCCATCACACTGGCGGCCGCTCGAGGTCGACGGTATCGATAAGCTT

The AtU6-26 sequence and sgRNA are highlighted in magenta and yellow, respectively.

#### >OsU6-2 sgRNA

GGTACCGAGCTCGGATCCACTAGTAACGGCCGCCAGTGTGCTGGAATTGCCCTTG  
GATCATGAACCAACGGCCTGGCTGTATTTGGTGGTTGTGTAGGGAGATGGGGAGA  
AGAAAAGCCCGATTCTCTTCGCTGTGATGGGCTGGATGCATGCGGGGGAGCGGGA  
GGCCCAAGTACGTGCACGGTGAGCGGCCACAGGGCGAGTGTGAGCGCGAGAGG  
CGGGAGGAACAGTTTAGTACCACATTGCCAGCTAACTCGAACGCGACCAACTTAT  
AAACCCGCGCGCTGTCGCTTGTGTGGGTCTTCGAGAAGACCTGTTTTAGAGCTAG  
AAATAGCAAGTTAAAATAAGGCTAGTCCGTTATCAACTTGAAAAAGTGGCACC  
GATTCGGTGCTTTTTTTGTCCCTTCGAAGGGCAATTCTGCAGATATCCATCACACTGGC  
GGCCGCTCGAGGTCGACGGTATCGATAAGCTT

The OsU6-2 sequence and sgRNA are highlighted in green and yellow, respectively.

#### >2×35S-Cas9-Nos

AAGCTTGCATGCCTGCAGGTCAACATGGTGGAGCACGACACACTTGTCTACTCCA  
AAAATATCAAAGATACAGTCTCAGAAGACCAAAGGGCAATTGAGACTTTTCAACA  
AAGGGTAATATCCGGAAACCTCCTCGGATTCCATTGCCAGCTATCTGTCACTTTAT  
TGTGAAGATAGTGGAAAAGGAAGGTGGCTCCTACAAATGCCATCATTGCGATAAA  
GGAAAGGCCATCGTTGAAGATGCCTCTGCCGACAGTGGTCCCAAAGATGGACCCC  
CACCCACGAGGAGCATCGTGGAAAAGAAGACGTTCCAACCACGTCTTCAAAGC  
AAGTGGATTGATGTGATAACATGGTGGAGCACGACACACTTGTCTACTCCAAAAT  
ATCAAAGATACAGTCTCAGAAGACCAAAGGGCAATTGAGACTTTTCAACAAAGGG  
TGATATCCGGAAACCTCCTCGGATTCCATTGCCAGCTATCTGTCACTTTATTGTGA  
AGATAGTGGAAAAGGAAGGTGGCTCCTACAAATGCCATCATTGCGATAAAGGAAA

GGCCATCGTTGAAGATGCCTCTGCCGACAGTGGTCCCAAAGATGGACCCCCACCC  
ACGAGGAGCATCGTGGAAAAAGAAGACGTTCCAACCACGTCTTCAAAGCAAGTG  
GATTGATGTGATATCTCCACTGACGTAAGGGATGACGCACAATCCACTATCCTTCG  
CAAGACCCTTCTCTATATAAGGAAGTTCATTTTCATTTGGAGAGGACCTCGACCTC  
AACACAACATATAAAAACAAACGAATCTCAAGCAATCAAGCATTCTACTTCTATT  
GCAGCAATTTAAATCATTCTTTTAAAGCAAAAGCAATTTTCTGAAAATTTTCACCA  
TTTACGAACGATACTCGAGATGGACTATAAGGACCACGACGGAGACTACAAGGAT  
CATGATATTGATTACAAAGACGATGACGATAAGATGGCCCCAAAGAAGAAGCGGA  
AGGTTCGGTATCCACGGAGTCCCAGCAGCCGACAAGAAGTACAGCATCGGCCTGGA  
CATCGGCACCAACTCTGTGGGCTGGGCCGTGATCACCGACGAGTACAAGGTGCC  
AGCAAGAAATTCAAGGTGCTGGGCAACACCGACCGGCACAGCATCAAGAAGAAC  
CTGATCGGAGCCCTGCTGTTTCGACAGCGGCGAAACAGCCGAGGCCACCCGGCTG  
AAGAGAACCGCCAGAAGAAGATACACCAGACGGAAGAACCGGATCTGCTATCTG  
CAAGAGATCTTCAGCAACGAGATGGCCAAGGTGGACGACAGCTTCTTCCACAGAC  
TGGAAGAGTCCTTCCTGGTGGAAAGAGGATAAGAAGCACGAGCGGCACCCCATCTT  
CGGCAACATCGTGGACGAGGTGGCCTACCACGAGAAGTACCCACCATCTACCAC  
CTGAGAAAGAACTGGTGGACAGCACCGACAAGGCCGACCTGCGGCTGATCTATC  
TGGCCCTGGCCACATGATCAAGTTCGGGGGCCACTTCTGATCGAGGGGCGACCT  
GAACCCCGACAACAGCGACGTGGACAAGCTGTTTCATCCAGCTGGTGCAGACCTAC  
AACCAGCTGTTTCGAGGAAAACCCATCAACGCCAGCGGCGTGGACGCCAAGGCC  
ATCCTGTCTGCCAGACTGAGCAAGAGCAGACGGCTGGAAAATCTGATCGCCCAGC  
TGCCCGGCGAGAAGAAGAATGGCCTGTTTCGAAACCTGATTGCCCTGAGCCTGGG  
CCTGACCCCAACTTCAAGAGCAACTTCGACCTGGCCGAGGATGCCAAACTGCAG  
CTGAGCAAGGACACCTACGACGACGACCTGGACAACCTGCTGGCCAGATCGGC  
GACCAGTACGCCGACCTGTTTTCTGGCCGCCAAGAACCTGTCCGACGCCATCCTGC  
TGAGCGACATCCTGAGAGTGAACACCGAGATCACCAAGGCCCCCCTGAGCGCCTC  
TATGATCAAGAGATACGACGAGCACCACCAGGACCTGACCCTGCTGAAAGCTCTC  
GTGCGGCAGCAGCTGCCTGAGAAGTACAAAGAGATTTTCTTCGACCAGAGCAAGA  
ACGGCTACGCCGGCTACATTGACGGCGGAGCCAGCCAGGAAGAGTTCTACAAGTT  
CATCAAGCCATCCTGGAAAAGATGGACGGCACCCGAGGAACTGCTCGTGAAGCTG  
AACAGAGAGGACCTGCTGCGGAAGCAGCGGACCTTCGACAACGGCAGCATCCCC  
CACCAGATCCACCTGGGAGAGCTGCACGCCATTCTGCGGCGGCAGGAAGATTTT  
ACCCATTCCTGAAGGACAACCGGGAAAAGATCGAGAAGATCCTGACCTTCCGCAT  
CCCCTACTACGTGGGCCCTCTGGCCAGGGGAAACAGCAGATTCGCCTGGATGACC  
AGAAAGAGCGAGGAAACCATCACCCCCTGGAACCTTCGAGGAAGTGGTGGACAAG  
GGCGCTTCCGCCAGAGCTTCATCGAGCGGATGACCAACTTCGATAAGAACCTGC  
CCAACGAGAAGGTGCTGCCAAGCACAGCCTGCTGTACGAGTACTTCACCGTGTA  
TAACGAGCTGACCAAAGTGAATACGTGACCGAGGGAATGAGAAAGCCCGCCTTC  
CTGAGCGGCGAGCAGAAAAAGGCCATCGTGGACCTGCTGTTCAAGACCAACCGG  
AAAGTGACCGTGAAGCAGCTGAAAGAGGACTACTTCAAGAAAATCGAGTGCTTC  
GACTCCGTGGAAATCTCCGGCGTGGAAAGATCGGTTCAACGCCTCCCTGGGCACAT  
ACCACGATCTGCTGAAAATTATCAAGGACAAGGACTTCCTGGACAATGAGGAAAA  
CGAGGACATTCTGGAAGATATCGTGCTGACCCTGACACTGTTTGAGGACAGAGAG  
ATGATCGAGGAACGGCTGAAAACCTATGCCACCTGTTTCGACGACAAAAGTGATGA

AGCAGCTGAAGCGGCGGAGATACACCGGCTGGGGCAGGCTGAGCCGGAAGCTGA  
TCAACGGCATCCGGGACAAGCAGTCCGGCAAGACAATCCTGGATTTCTGAAGTC  
CGACGGCTTCGCCAACAGAACTTCATGCAGCTGATCCACGACGACAGCCTGACC  
TTTAAAGAGGACATCCAGAAAGCCCAGGTGTCCGGCCAGGGCGATAGCCTGCACG  
AGCACATTGCCAATCTGGCCGGCAGCCCCGCCATTAAGAAGGGCATCCTGCAGAC  
AGTGAAGGTGGTGGACGAGCTCGTGAAAAGTGATGGGCCGGCACAAGCCCCGAGAA  
CATCGTGATCGAAATGGCCAGAGAGAACCAGACCACCCAGAAGGGACAGAAGAA  
CAGCCGCGAGAGAATGAAGCGGATCGAAGAGGGCATCAAAGAGCTGGGCAGCCA  
GATCCTGAAAGAACACCCCGTGGAAAACACCCAGCTGCAGAACGAGAAGCTGTA  
CCTGTACTACCTGCAGAATGGGCGGGATATGTACGTGGACCAGGAACTGGACATCA  
ACCGGCTGTCCGACTACGATGTGGACCATATCGTGCCTCAGAGCTTTCTGAAGGAC  
GACTCCATCGACAACAAGGTGCTGACCAGAAGCGACAAGAACCAGGGGCAAGAGC  
GACAACGTGCCCTCCGAAGAGGTCGTGAAGAAGATGAAGAACTACTGGCGGCAG  
CTGCTGAACGCCAAGCTGATTACCCAGAGAAAGTTCGACAATCTGACCAAGGCCG  
AGAGAGGCGGCCTGAGCGAACTGGATAAGGCCGGCTTCATCAAGAGACAGCTGG  
TGAAAACCCGGCAGATCACAAGCACGTGGCACAGATCCTGGACTCCCGGATGAA  
CACTAAGTACGACGAGAATGACAAGCTGATCCGGGAAGTGAAAGTGATCACCCCTG  
AAGTCCAAGCTGGTGTCCGATTTCCGGAAGGATTTCCAGTTTTACAAAGTGCGCG  
AGATCAACAACCTACCACCACGCCACGACGCCTACCTGAACGCCGTCGTGGGAAC  
CGCCCTGATCAAAAAGTACCCTAAGCTGGAAAGCGAGTTCGTGTACGGCGACTAC  
AAGGTGTACGACGTGCGGAAGATGATCGCCAAGAGCGAGCAGGAAATCGGCAAG  
GCTACCGCCAAGTACTTCTTCTACAGCAACATCATGAACTTTTTCAAGACCGAGAT  
TACCCTGGCCAACGGCGAGATCCGGAAGCGGCCTCTGATCGAGACAAACGGCGA  
AACCGGGGAGATCGTGTGGGATAAGGGCCGGGATTTTGCCACCGTGCGGAAAGTG  
CTGAGCATGCCCCAAGTGAATATCGTGAAAAAGACCGAGGTGCAGACAGGCGGCT  
TCAGCAAAGAGTCTATCCTGCCAAGAGGAACAGCGATAAGCTGATCGCCAGAAA  
GAAGGACTGGGACCCTAAGAAGTACGGCGGCTTCGACAGCCCCACCGTGGCCTAT  
TCTGTGCTGGTGGTGGCCAAAGTGGAAGGGCAAGTCCAAGAACTGAAGAGT  
GTGAAAGAGCTGCTGGGGATCACCATCATGGAAAGAAGCAGCTTCGAGAAGAATC  
CCATCGACTTTCTGGAAAGCCAAGGGCTACAAAGAAGTGAAAAAGGACCTGATCAT  
CAAGCTGCCTAAGTACTCCCTGTTTCGAGCTGGAAAACGGCCGGAAGAGAATGCTG  
GCCTCTGCCGGCGAACTGCAGAAGGGAAACGAACTGGCCCTGCCCTCCAAATATG  
TGAACTTCTGTACCTGGCCAGCCACTATGAGAAGCTGAAGGGCTCCCCGAGGA  
TAATGAGCAGAAACAGCTGTTTGTGGAACAGCACAAAGCACTACCTGGACGAGATC  
ATCGAGCAGATCAGCGAGTTCTCCAAGAGAGTGATCCTGGCCGACGCTAATCTGG  
ACAAAGTGCTGTCCGCTACAACAAGCACCGGGATAAGCCCATCAGAGAGCAGGC  
CGAGAATATCATCCACCTGTTTACCCTGACCAATCTGGGAGCCCCCTGCCGCCTTCA  
AGTACTTTGACACCACCATCGACCGGAAGAGGTACACCAGCACCAAAGAGGTGCT  
GGACGCCACCCTGATCCACCAGAGCATCACCGGCCTGTACGAGACACGGATCGAC  
CTGTCTCAGCTGGGAGGCGACAAAAGGCCGGCGGCCACGAAAAAGGCCGGCCAG  
GCAAAAAAGAAAAAGTAAGGATCCTGATTGATCGATAGAGCTCGAATTTCCCCGAT  
CGTTCAAACATTTGGCAATAAAGTTTCTTAAGATTGAATCCTGTTGCCGGTCTTGCG  
ATGATTATCATATAATTTCTGTTGAATTACGTTAAGCATGTAATAATTAACATGTAATG  
CATGACGTTATTTATGAGATGGGTTTTTATGATTAGAGTCCCGCAATTATACATTTAA

TACGCGATAGAAAACAAAATATAGCGCGCAAACCTAGGATAAATTATCGCGCGCGGT  
GTCATCTATGTTACTAGATCGGGAATTC

The **2x35S**, 3xFLAG, NLS, **hSpCas9** and Nos terminator sequences are highlighted, respectively.

## REFERENCES

1. Cong, L. et al. Multiplex Genome Engineering Using CRISPR/Cas Systems. *Science* **339**, 819-823 (2013).
2. Yoo, S.D., Cho, Y.H. & Sheen, J. *Arabidopsis* mesophyll protoplasts: a versatile cell system for transient gene expression analysis. *Nature protocols* **2**, 1565-1572 (2007).
3. Clough, S.J. & Bent, A.F. Floral dip: a simplified method for *Agrobacterium*-mediated transformation of *Arabidopsis thaliana*. *The Plant Journal* **16**, 735-743 (1998).
4. Hiei, Y., Ohta, S., Komari, T. & Kumashiro, T. Efficient transformation of rice (*Oryza sativa* L.) mediated by *Agrobacterium* and sequence analysis of the boundaries of the T-DNA. *The Plant Journal* **6**, 271-282 (1994).
